# Supplementary material for: OnabotulinumtoxinA is a well tolerated and effective treatment for refractory overactive bladder in real-world practice
Source: Springer Nature journal article supplement (doi:10.1007/s00192-020-04423-0), 2020-07-27
Supplement: MOESM1 [file 18219054]

## Supplementary materials

**Supplementary Table 1** Patient disposition

| Patients, n (%)                   | Safety analysis population<br>(N = 504) |
|-----------------------------------|-----------------------------------------|
| Baseline documentation available  | 504 (100)                               |
| Completion of the study           | 299 (59.3)                              |
| Early discontinuation             | 205 (40.7)                              |
| Reasons for early discontinuation |                                         |
| Lost to follow-up                 | 148 (29.4)                              |
| Patient's decision                | 2 (0.4)                                 |
| Patient safety consideration      | 1 (0.2)                                 |
| Other                             | 7 (1.4)                                 |
| Missing reasons                   | 47 (9.3)                                |
